# Supplementary material for: Fabrication of high-performance symmetrical coin cell supercapacitors by using one step and green synthesis sulfur doped graphene powders
Source: Royal Society of Chemistry journal article supplement (doi:10.1039/d0nj06061e), 2021-01-01
Supplement: d0nj06061e1.pdf [file d0nj06061e1.pdf]

## **Fabrication of High-Performance Symmetrical Coin Cell Supercapacitors by Using One Step and Green Synthesis Sulfur Doped Graphene Powders**

Melih Besir Arvas<sup>1</sup>, Nilgün Karatepe<sup>2</sup>, Metin Gençten<sup>3</sup>, Yucel Sahin<sup>1\*</sup>

<sup>1</sup> Yıldız Technical University, Faculty of Art and Sciences, Department of Chemistry, 34210, Istanbul, Turkey

<sup>2</sup> Istanbul Technical University, Institute of Energy, Renewable Energy Division, 34469, Istanbul, Turkey

<sup>3</sup> Yıldız Technical University, Faculty of Chemical and Metallurgical Engineering, Department of Metallurgy and Materials Engineering, 34210 Istanbul, Turkey.

**\*Corresponding author:** Yücel ŞAHİN  
Department of Chemistry, Faculty of Arts&Science  
Yildiz Technical University, 34210 Istanbul, Turkey  
Tel.: +90 212 3834411  
Fax: +90 212 3834134  
E-mail: [yucelsahin06@gmail.com](mailto:yucelsahin06@gmail.com)

**Supplementary Document**

**Fig. S1**

**a)**

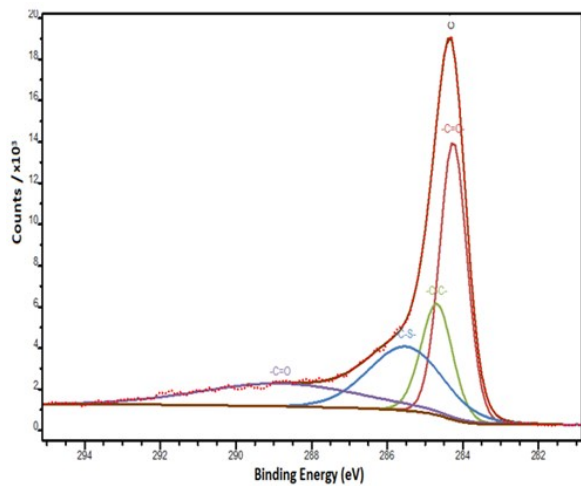

**b)**

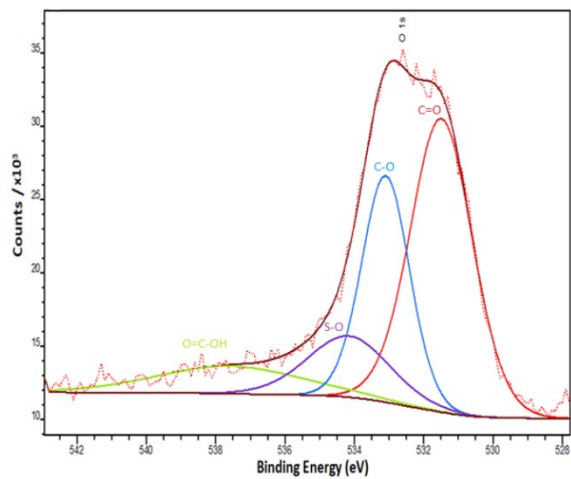

**c)**

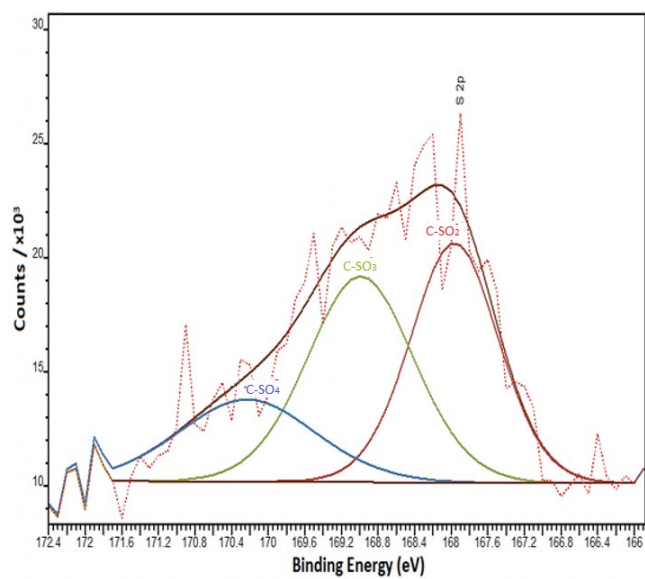

**Fig. S1. a C1s, b O1s and c S2p XPS spectra of A-SG1**

**Fig. S2**

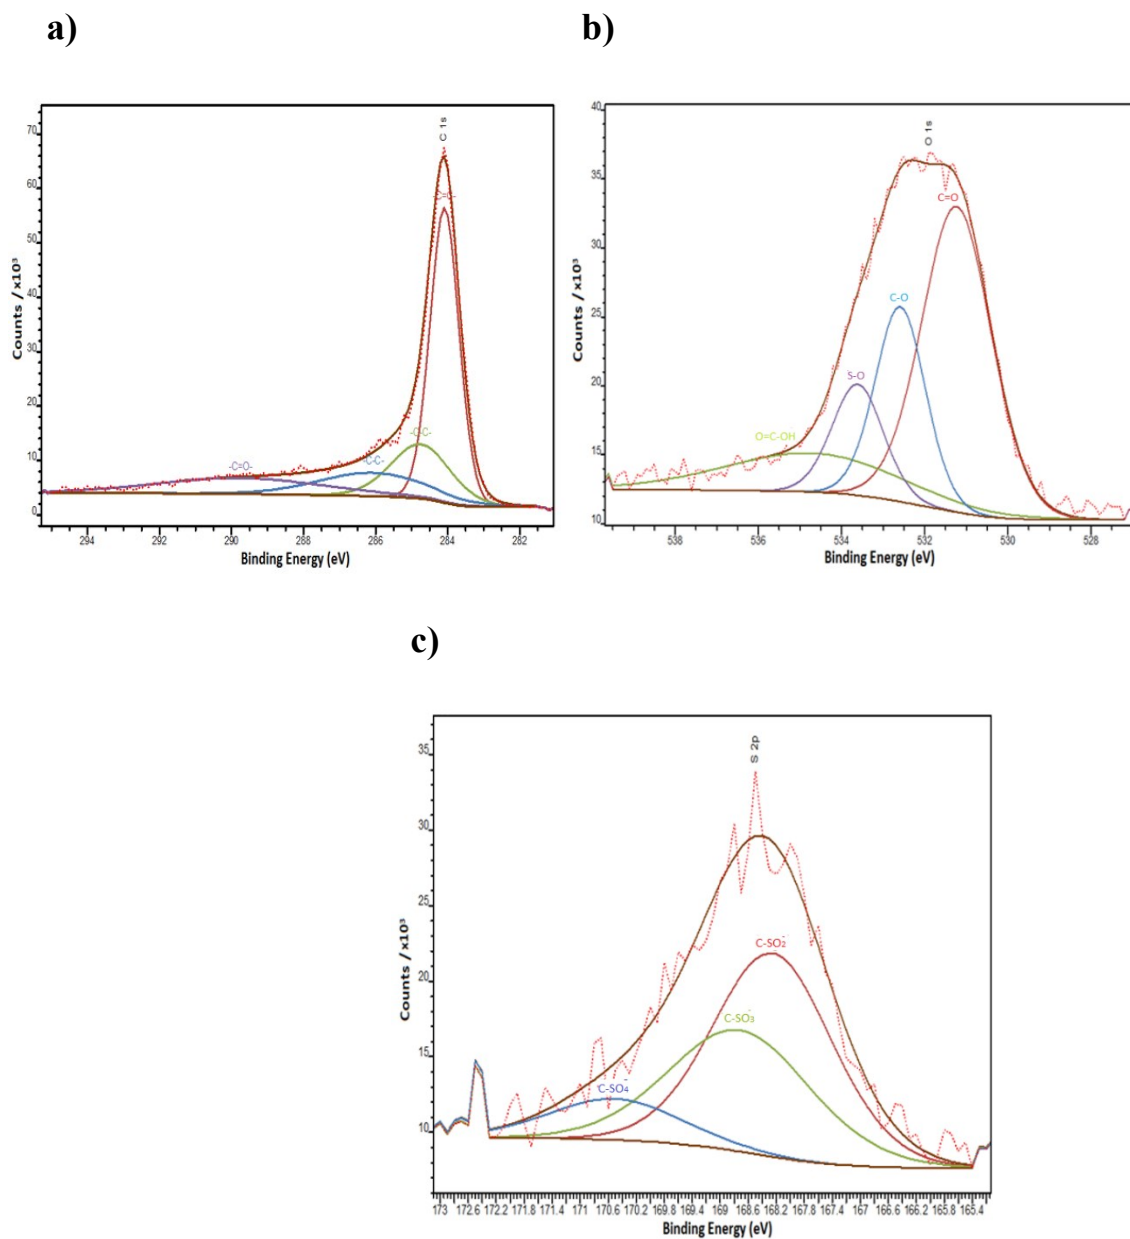

**Fig. S2.** C1s, b O1s and c S2p XPS spectra of A-SG2

**Fig. S3**

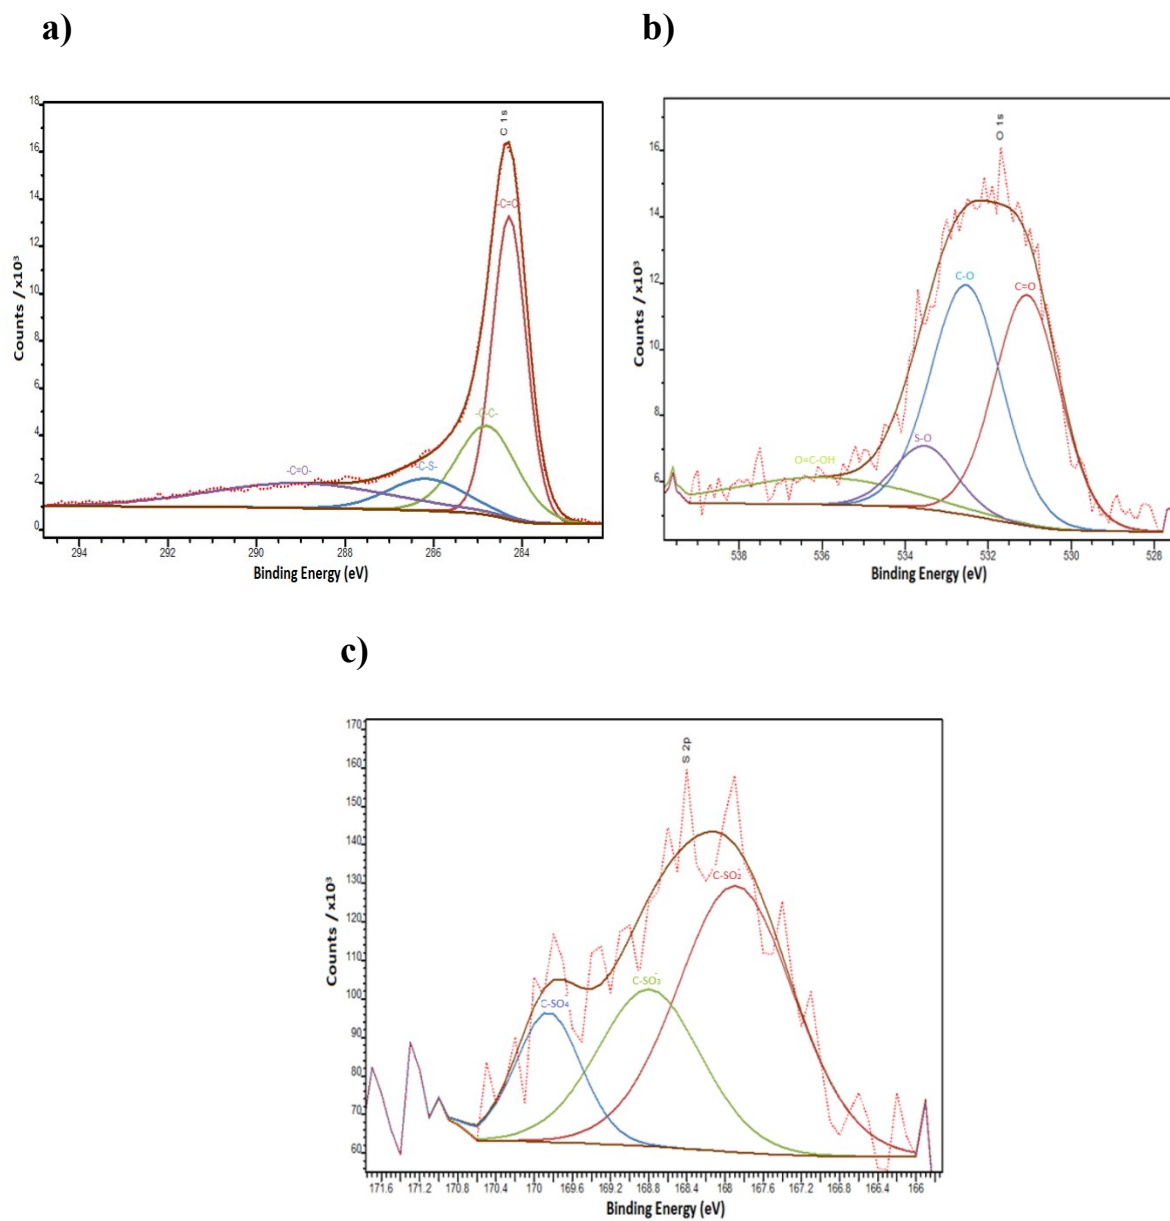

**Fig. S3 C1s, b O1s and c S2p XPS spectra of A-SG3**

**Fig. S4**

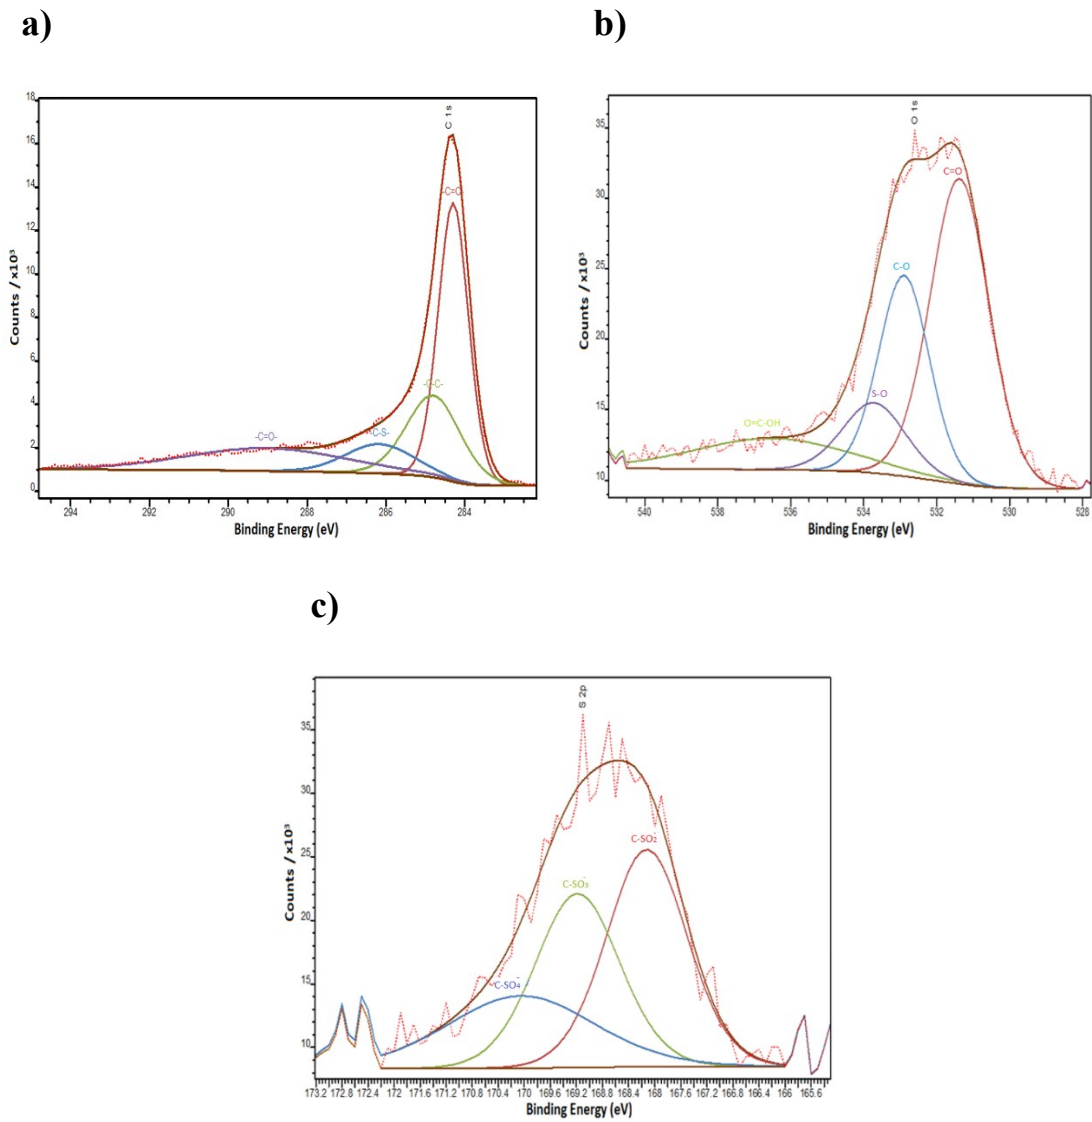

**Fig. S4 C1s, b O1s and c S2p XPS spectra of C-SG3**

**Fig. S5**

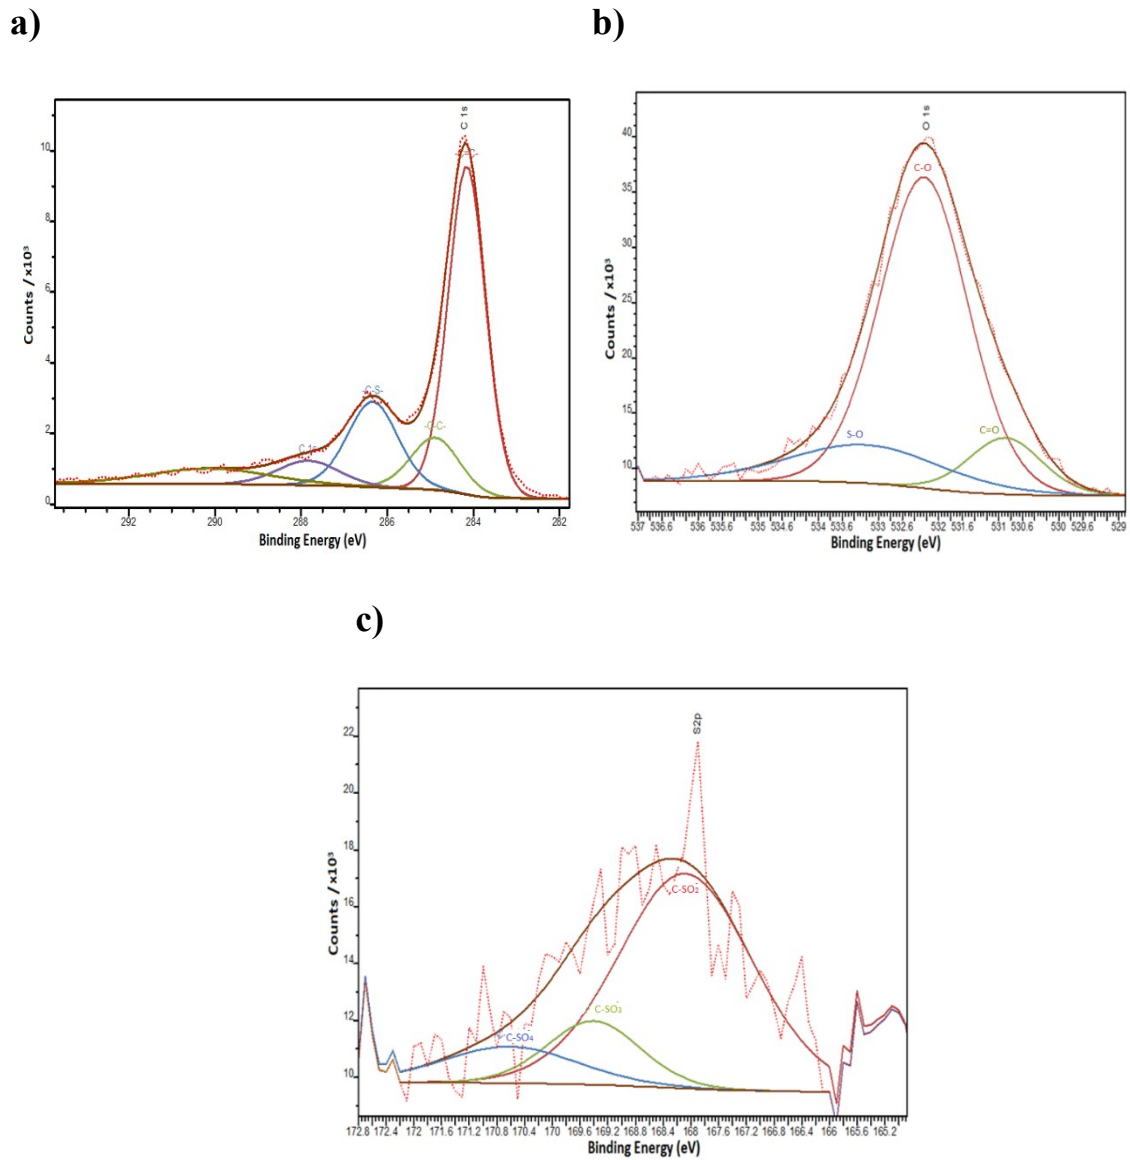

**Fig. S5 C1s, b O1s and c S2p XPS spectra of A-SG3M**

**Fig. S6**

**a)**

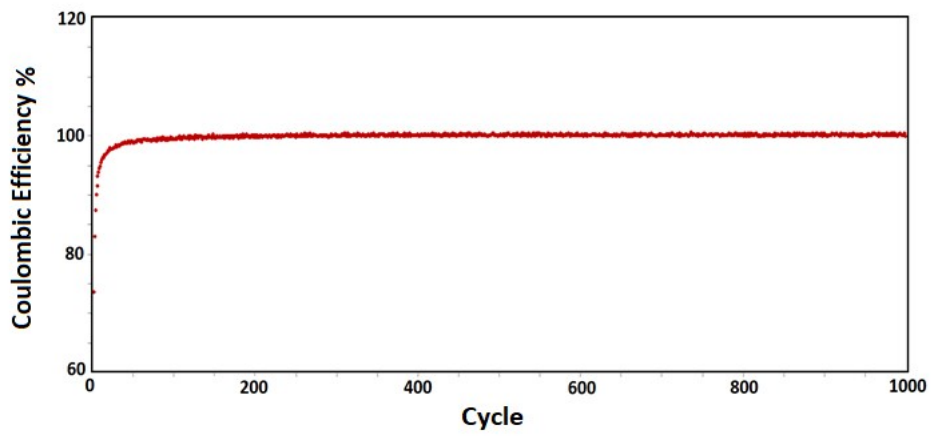

**b)**

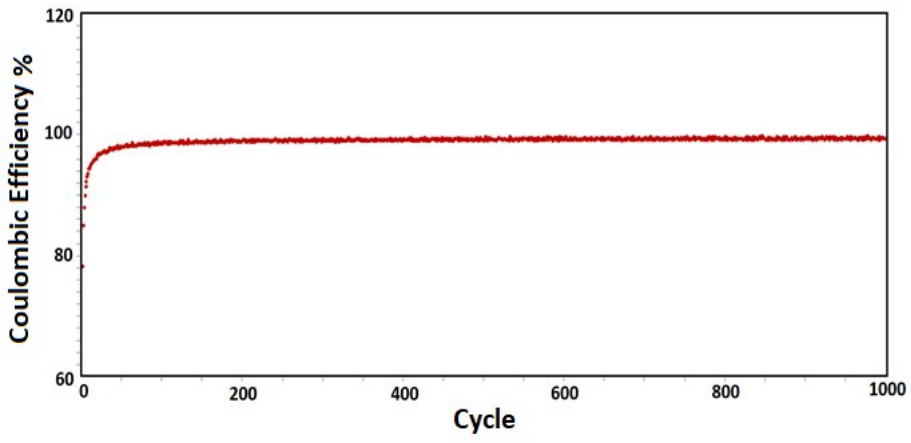

**c)**

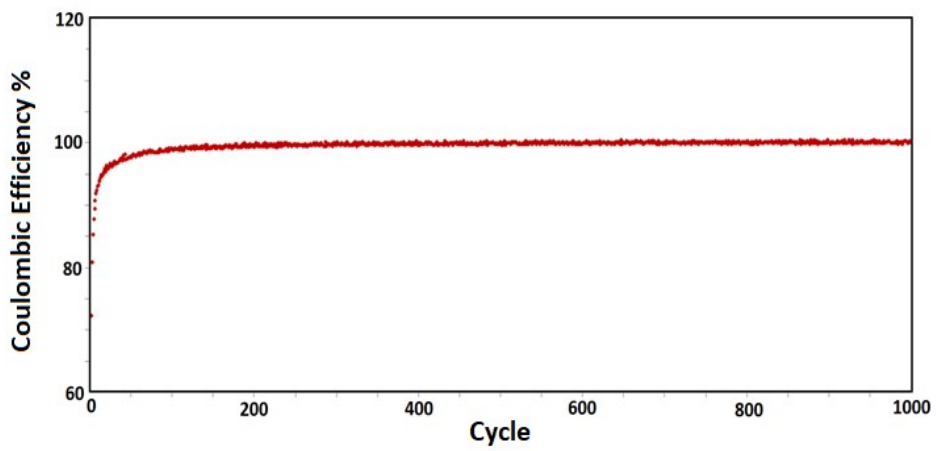

d)

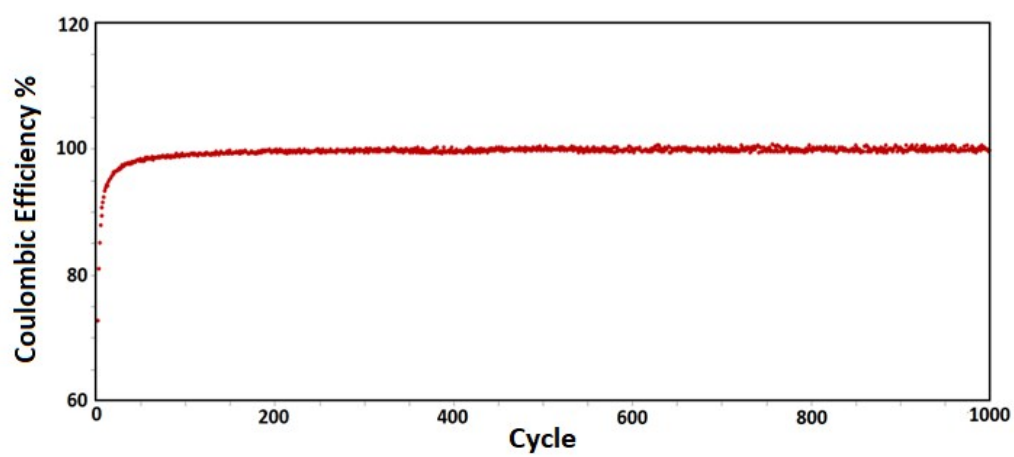

**Fig. S6** Coulombic efficiency of **a** A-SG1, **b** A-SG2, **c** A-SG3 and **d** A-SG3M including coin cells for 1000 cycles in 1.0 M sulfuric acid
